# Supplementary material for: Atomic periodic engineering enabled ultrathin high-efficiency AgBiS2 solar cells
Source: Royal Society of Chemistry journal article supplement (doi:10.1039/d2cc04610e), 2022-01-01
Supplement: d2cc04610e2.pdf [file d2cc04610e2.pdf]

## Supporting information for

# Atomic Periodic Engineering Enabled Ultrathin High-Efficiency AgBiS<sub>2</sub> Solar Cells

Xue Liu, Hongbin Xiao, \* Zhigang Zang, and Ru Li\*

Key Laboratory of Optoelectronic Technology & Systems (Ministry of Education), College of Optoelectronic Engineering, Chongqing University, Chongqing 400044, China.

\*Corresponding authors.

Email: xiaohongbin@cqu.edu.cn, ru.li@cqu.edu.cn

## Calculation details

*Structure Construction and Geometry Optimization:* AgBiS<sub>2</sub> crystal structures with different space groups are constructed by VESTA 3.5.7,<sup>[1]</sup> whose lattice vectors and atom positions are optimized by using the projected augmented wave (PAW) method and the Perdew–Burke–Ernzerhof generalized gradient approximation (PBE-GGA) that are implemented in the Vienna ab initio simulation package (VASP 6.1.1).<sup>[2-5]</sup> The cutoff energy of 520 eV, and the tolerance of 10<sup>-6</sup> eV for the SCF cycle are set. The atomic force is set to be smaller than 0.02 eV Å<sup>-1</sup> during the geometrical optimization.  $\Gamma$ -centered  $6 \times 6 \times 4$ ,  $9 \times 9 \times 1$ , and  $4 \times 4 \times 2$  points with k-spacing of  $2\pi \times 0.04$  Å<sup>-1</sup> are used to sample the Brillouin zone of tetra-P4/mmm, trigon-R $\bar{3}m$  and tetra-I4<sub>1</sub>/amd AgBiS<sub>2</sub>, respectively. Open-source code VASPKIT 1.3.5 is used to prepare the input files.<sup>[6]</sup>

*Ab Initio Molecular Dynamics Simulations.* AIMD simulations of tetra-P4/mmm, trigon-R $\bar{3}m$  and tetra-I4<sub>1</sub>/amd AgBiS<sub>2</sub> are carried out with a  $3 \times 3 \times 3$  supercell using the PAW method and the PBE-GGA implemented in VASP 6.1.1. The canonical ensemble (*NVT*) with a Nose-Hoover thermostat is used to control the temperature during the simulation. AIMD has been run for 5 ps with temperature of 300 K and the time step of 1 fs, the atomic trajectory data every 10 fs are collected to analysis the pair correlation function. The other basic parameters are in agreement with that of the geometrical optimizations.

*Phonon dispersion calculations.* The phonon dispersion of tetra-P4/mmm, trigon-R $\bar{3}m$  and tetra-I4<sub>1</sub>/amd AgBiS<sub>2</sub> are carried out are performed by force constants method (VASP-DFPT) implemented in the PHONOPY code. The energy cutoff is increased to

800 eV, and high symmetry points is selected from the suggestion from online tools Seek-Path.

*Electronic and Optical Calculations:* Hybrid functional HSE06+SOC is used to calculate the electronic band structure of the tetra-P4/mmm, trigon-R $\bar{3}m$  and tetra-I4 $_1$ /amd AgBiS $_2$ , respectively. Effective mass of the electron and hole is obtained by Python code Effmass,<sup>[7]</sup> and the Wannier-Mott exciton binding energy is calculated according to  $\mu R_y/m_0 \epsilon_r^2$ , where is  $R_y$  the Rydberg unit of energy,  $\epsilon_r$  is the static dielectric constant,  $\mu = (m_e^* m_h^*)/(m_e^* + m_h^*)$  is the reduced mass of the electron and hole,  $m_0$  is the electron mass. The frequency dependent dielectric constant is computed within the framework of Random-Phase-Approximation (RPA) utilizing HSE06 eigenvalues and eigenfunctions. VASPKIT code is used to post process the linear optical properties from the frequency-dependent complex dielectric function. Shockley Queisser limited efficiency data is adopted from reference<sup>[8]</sup> and replotted for comparison.

*Spectroscopic Limited Maximum Efficiency (SLME) calculation:* The SLME was introduced by Yu and Zunger,<sup>[9]</sup> where it gives the theoretical efficiency of a material that depends mainly on two parameters. First, the band gap and the nature of the band gap of the material, and second the optical absorption coefficient of the material. The absorption coefficient gives us the penetration depth of a photon with particular energy before which it can get absorbed by the material. The SLME ( $\eta$ ) is defined as

$$\eta = \frac{P_m}{P_{in}}$$

where  $P_m$  is the maximum power density, and  $P_{in}$  is the incident power density from the solar spectrum. The J-V characteristic of the solar cell gives the maximum power density for the SLME.

$$P = JV = (J_{sc} - J_0(e^{\frac{eV}{kT}} - 1))V$$

where  $J$  and  $V$  are the total current density and potential over the absorber layer, respectively.  $k$  is Boltzmann's constant,  $T$  is the temperature, and  $e$  is the elementary charge.  $J_{sc}$  and  $J_0$  are the short-circuit current density and reverse saturation current density, respectively. The absorption coefficient of the material  $\alpha(\omega)$ , the AM1.5G solar spectrum  $I_{sun}(E)$ , and the black-body spectrum  $I_{bb}(E,T)$  define the  $J_{sc}$  and  $J_0$ .

$$J_{sc} = e \int_0^{\infty} \alpha(\omega) I_{sun}(E) dE$$

$$J_0 = \frac{J_0^r}{f_r} = \frac{e\pi}{f} \int_0^\infty \alpha(\omega) I_{bb}(E, T) dE$$

$J_0^r$  is the radiative recombination current density, and  $f_r$  is the fraction of radiative recombination, which is defined by the following equation.

$$f_r = \exp\left(\frac{E_g^{da} - E_g}{kT}\right)$$

where  $E_g$  and  $E_g^{da}$  are the fundamental and direct allowed band gap, respectively. We used the VASPKIT code for post-processing of the VASP calculated data, and the SLME is calculated by VASPKIT 1.3.5.

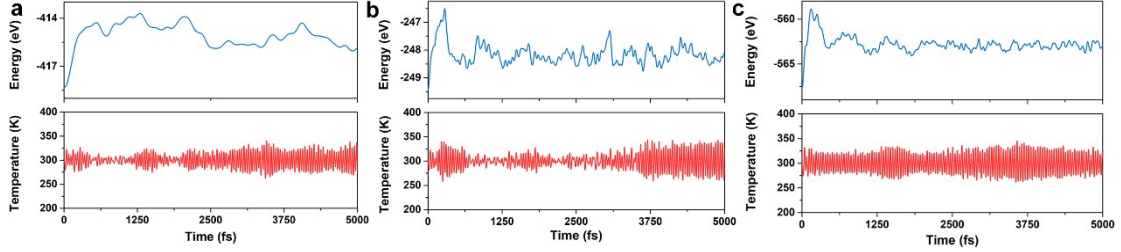

**Figure S1.** Energy and temperature during the simulation of (a) tetra-P4/mmm, (b) trigon-R $\bar{3}$ m and (c) tetra-I4 $_1$ /amd AgBiS $_2$  structures.

**Table S1.** Structure features, formation energy ( $\Delta E$ , eV/atom), energy bandgap ( $E_g$  at HSE06+SOC level) and the nature of electronic band structure of the proposed AgBiS $_2$  structures.

|                      | Structure features                                | $\Delta E$ (eV) | $E_g$ (eV) | Type             |
|----------------------|---------------------------------------------------|-----------------|------------|------------------|
| tetra-P4/mmm         | Four edge shared BiS $_6$ octahedron              | 0               | 0          | Metallic         |
| trigon-R $\bar{3}$ m | Six edge shared titled BiS $_6$ octahedron        | -0.104          | 1.118      | Indirect bandgap |
| tetra-I4 $_1$ /amd   | Three edge shared intertwined BiS $_6$ octahedron | -0.059          | 0.972      | Direct bandgap   |

**Table S2.** Calculated effective carrier mass  $m^*$ , Wannier-Mott exciton binding energy  $E_b$ , static dielectric constant  $\epsilon_r$  that contributed by ionic ( $\epsilon_{ion}$ ) and electronic ( $\epsilon_\infty$ ) of semiconducting AgBiS $_2$ .

|                     | $m^*/m_0$ | $E_b$ (meV) | $\epsilon_{ion}$ | $\epsilon_{\infty}$ | $\epsilon_r$  |
|---------------------|-----------|-------------|------------------|---------------------|---------------|
| trigon- $R\bar{3}m$ | 0.7397(h) | 0.15        | 96.18(XX/YY)     | 19.43(XX/YY)        | 115.61(XX/YY) |
|                     | 0.1929(e) | 1.62        | 22.64(ZZ)        | 12.44(ZZ)           | 35.08(ZZ)     |
| tetra- $I4_1/amd$   | 0.8575(h) | 0.34        | 61.62(XX/YY)     | 57.70(XX/YY)        | 119.32(XX/YY) |
|                     | 0.6320(e) | 0.0047      | 991.63(ZZ)       | 25.43(ZZ)           | 1017.06(ZZ)   |

\*These are traces of dielectric tensors

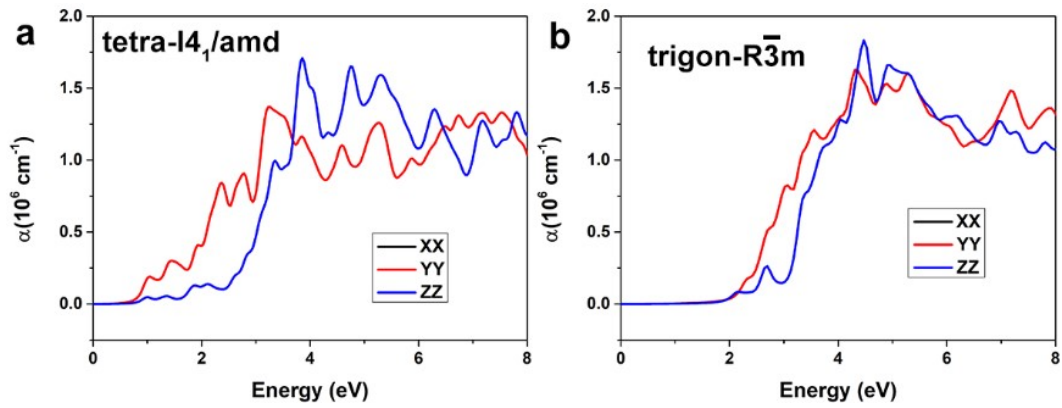

**Figure S2.** Calculated  $XX/YY/ZZ$  components absorption coefficient of anisotropic (a) tetra- $I4_1/amd$  and (b) trigon- $R\bar{3}m$   $AgBiS_2$ .

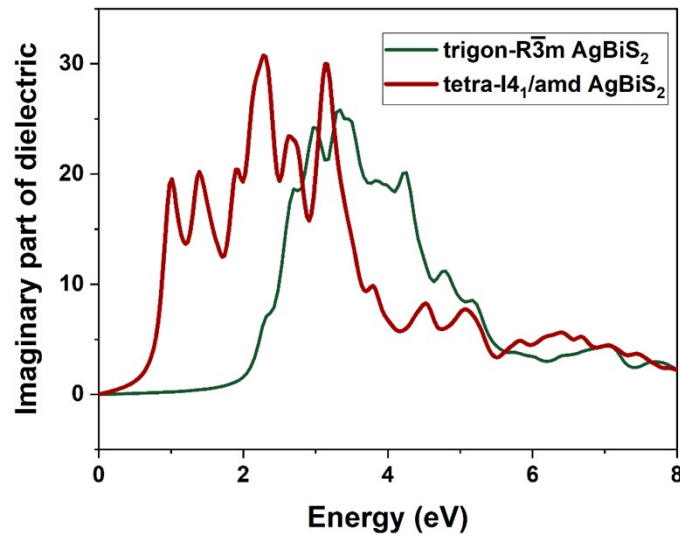

**Figure S3.** Calculated imaginary part of dielectric constant for tetra- $I4_1/amd$  and trigon- $R\bar{3}m$   $AgBiS_2$ .

## Reference

1. Momma K, Izumi F. VESTA 3 for three-dimensional visualization of crystal, volumetric and morphology data. *Journal of applied crystallography* 2011, **44**(6): 1272-1276.
2. Blöchl PE. Projector augmented-wave method. *Physical Review B* 1994, **50**(24): 17953-17979.
3. Kresse G, Furthmüller J. Efficient iterative schemes for ab initio total-energy calculations using a plane-wave basis set. *Physical Review B* 1996, **54**(16): 11169-11186.
4. Kresse G, Joubert D. From ultrasoft pseudopotentials to the projector augmented-wave method. *Physical Review B* 1999, **59**(3): 1758-1775.
5. Perdew JP, Burke K, Ernzerhof M. Generalized gradient approximation made simple. *Physical review letters* 1996, **77**(18): 3865.
6. Wang V, Xu N, Liu J-C, Tang G, Geng W-T. VASPKIT: A user-friendly interface facilitating high throughput computing and analysis using VASP code. *Computer Physics Communications* 2021, **267**: 108033.
7. D. Whalley L. effmass: An effective mass package. *Journal of Open Source Software* 2018, **3**(28): 797.
8. Rühle S. Tabulated values of the Shockley–Queisser limit for single junction solar cells. *Solar Energy* 2016, **130**: 139-147.
9. Yu L, Zunger A. Identification of Potential Photovoltaic Absorbers Based on First-Principles Spectroscopic Screening of Materials. *Physical Review Letters* 2012, **108**(6): 068701.
